# Supplementary material for: Validation of the European Oncology toolkit for the self-assessment of Quality of Life (EUonQoL-Kit) in cancer patients and survivors: study protocol of a pan European survey
Source: PubMed Central journal article supplement — BMC Public Health. 2024 Dec 18;24:3517. doi: 10.1186/s12889-024-21008-4 (PMC11657460; doi:10.1186/s12889-024-21008-4), 2024-12-18
Supplement: 12889_2024_21008_MOESM2_ESM.pdf [file 12889_2024_21008_MOESM2_ESM.pdf]

## BMC Public Health

### Validation of the European Oncology toolkit for the self-assessment of Quality of Life (EUonQoL-Kit) in cancer patients and survivors: study protocol of a pan European survey.

Apolone G, Costantini M, Caselli L, Bos N, Caraceni A, Couespel N, Ferrer M, Groenvold M, Kaasa S, Ciliberto G, Lombardo C, Pietrobon R, Pravettoni G, Sirven A, Vachon H, Velikova G, Garin O, Gilbert A, Machiavelli A, Marzorati C, Miceli R, Pe M, Petersen MA, Tanzilli A, van Schelven F, Dantas C, Minnée-van Braak I, Pinnavaia L, Brunelli C; for the EUonQoL WG.

**Table 1. List of approving ECs and associated study approval numbers for the 45 clinical centres participating in the survey.**

| #  | Clinical Centre                                                       | Ethics Committee                                                                | Study Approval Number                          |
|----|-----------------------------------------------------------------------|---------------------------------------------------------------------------------|------------------------------------------------|
| 1  | The Medical University of Graz (Austria)                              | Medizinische Universität Graz Ethikkommission                                   | 36-348ex23/24                                  |
| 2  | Mother Teresa University Hospital of Tirana (Albania)                 | Internal Project Evaluation Committee                                           | 993/2                                          |
| 3  | Kortrijk Kankercentrum AZ Groeninge (Belgium)                         | Medical Ethics Committee, AZ Groeninge                                          | B3962024000038 (AZGS2023035)                   |
| 4  | Bulgarian Joint Cancer Network (Bulgaria):                            |                                                                                 |                                                |
|    | National University Oncology Hospital – Sofia                         | Bulgaria Ethics Committee                                                       | 421 / 01.04.2024                               |
|    | National University Hematology Hospital – Sofia                       | Bulgaria Ethics Committee                                                       | 10 / 26.02.2024                                |
| 5  | Sestre milosrdnice University Hospital Centre (Croatia)               | Ethics Committee University Hospital Center Sestre milosrdnice                  | Klasa 003-06/23-03/036<br>UrBr 251-29-11-23-09 |
| 6  | Cyprus Association of Cancer Patients and Friends - PASYKAF (Cyprus)  | EEBK EΠ 2024.01.260                                                             | 22809038/039, 22819101/122<br>22353878         |
| 7  | Masaryk Memorial Cancer Institute (Czech Republic)                    | Etická Komise Masarykova Onkologického Ústavu                                   | 2023/2612/MOU<br>MOU 459869                    |
| 8  | Region Hovedstaden (Rigshospitalet) (Denmark)                         | Capital Region of Denmark                                                       | P-2023-330                                     |
| 9  | Tartu University Hospital (Estonia)                                   | Research Ethics Committee of the University of Tartu (UT REC)                   | 387/T-34                                       |
| 10 | North Estonia Medical Centre (Estonia)                                | Research Ethics Committee of the University of Tartu (UT REC)                   | 387/T-34                                       |
| 11 | Syöpäkeskus Helsingin Yliopistollinen Sairaala - HUS (Finland)        | HUS alueellinen lääketieteellinen tutkimuseettinen toimikunta                   | HUS/1540/2024                                  |
| 12 | Institut de Cancérologie de l'Ouest - ICO (France)                    | Comité de protection des personnes Ile de France I                              | 23.04535.000317 – 2023-A02725-40               |
| 13 | Institut Curie (France)                                               | Comité de protection des personnes Ile de France I                              | 23.04535.000317 – 2023-A02725-40               |
| 14 | Gustave Roussy (France)                                               | Comité de protection des personnes Ile de France I                              | 23.04535.000317 – 2023-A02725-40               |
| 15 | Petre Shotadze Tbilisi Medical Academy (Georgia)                      | Bioethics International Committee of the Petre Shotadze Tbilisi Medical Academy | 11234447/1-1                                   |
| 16 | Universitäres Centrum für Tumorerkrankungen Frankfurt - UCT (Germany) | Ethikkommission des Fachbereichs Medizin der Goethe-Universität                 | 2023-1600                                      |

|    |                                                                                   |                                                                                                                                                             |                                                                                                           |
|----|-----------------------------------------------------------------------------------|-------------------------------------------------------------------------------------------------------------------------------------------------------------|-----------------------------------------------------------------------------------------------------------|
| 17 | Comprehensive Cancer Center Munich - CCC Munich (Germany)                         | Ethikkommission bei der Medizinischen Fakultät der LMU München                                                                                              | 23-0835                                                                                                   |
| 18 | German Cancer Research Center - DKFZ (Germany)                                    | Medical Faculty of the University of Heidelberg                                                                                                             | S-179/2024                                                                                                |
| 19 | General Oncology Hospital of Athens - Saint Savvas (Greece)                       | ΕΠΙΣΤΗΜΟΝΙΚΟ ΣΥΜΒΟΥΛΙΟ - ΥΠΟΥΡΓΕΙΟ ΥΓΕΙΑΣ 1η ΥΓΕΙΟΝΟΜΙΚΗ ΠΕΡΙΦΕΡΕΙΑ ΑΤΤΙΚΗΣ ΓΕΝΙΚΟ ΑΝΤΙΚΑΡΚΙΝΙΚΟ ΟΓΚΟΛΟΓΙΚΟ ΝΟΣΟΚΟΜΕΙΟ ΑΘΗΝΩΝ «Ο ΑΓΙΟΣ ΣΑΒΒΑΣ» Ν.Π.Δ.Δ.     | 4600/04-04-2023                                                                                           |
| 20 | Országos Onkológiai Intézet (Hungary)                                             | Zoltán Takácsi-Nagy, Committee on Regional and Institutional Research Ethics (REKEB) <i>Health Science Council Scientific and Research Ethics Committee</i> | BM/17573-1/2024 ETT-TUKEB                                                                                 |
| 21 | Trinity St. James's Cancer Institute (Ireland)                                    | SJH/TUH Joint Research and Ethics Committee                                                                                                                 | 4168/3444                                                                                                 |
| 22 | Istituto Tumori Giovanni Paolo II (Italy)                                         | Comitato Etico Locale IRCCS Istituto Oncologico "Gabriella Serio"                                                                                           | 1449/CEL                                                                                                  |
| 23 | Istituto Nazionale Tumori Regina Elena - IFO (Italy)                              | Comitato Etico Territoriale Lazio Area 5                                                                                                                    | 50/IRE/23                                                                                                 |
| 24 | Istituto Europeo di Oncologia - IEO (Italy)                                       | Comitato Etico Lombardia 2                                                                                                                                  | R1868/23 – IEO 2030 (UID 4415)                                                                            |
| 25 | Istituto Nazionale Tumori Milano - INT (Italy)                                    | Comitato Etico Territoriale Lombardia 4                                                                                                                     | INT106/23                                                                                                 |
| 26 | Riga East University Hospital (Latvia)                                            | Riga East Clinical University Hospital Support Foundation Medical and Biomedical Research Ethics Committee                                                  | 04-A/24                                                                                                   |
| 27 | National Cancer Institute (Lithuania)                                             | Vilnius Regional Biomedical Research Ethics Committee                                                                                                       | 2024/6-1597-1054                                                                                          |
| 28 | Oncologic Institute of Moldova (Republic of Moldova)                              | Comitetul de Etică/Bioetică al IMSP Institutul Oncologic                                                                                                    | 09/2024                                                                                                   |
| 29 | Netherlands Cancer Institute (Netherlands)                                        | NKI-AVL Institutional Review Board                                                                                                                          | IRBd24-084                                                                                                |
| 30 | Oslo University Hospital - OUS (Norway)                                           | Regional Ethical Committee South-East D                                                                                                                     | 714038                                                                                                    |
| 31 | Maria Skłodowska-Curie National Research Institute (Poland)                       | Komisji Bioetycznej                                                                                                                                         | 45/2024                                                                                                   |
| 32 | Greater Poland Cancer Centre (Poland)                                             | Komisja Bioetyczna Przyuniwersytecie Medycznym                                                                                                              | 920/23                                                                                                    |
| 33 | Instituto Português de Oncologia do Porto Francisco Gentil - IPO-Porto (Portugal) | CES-IPO Porto EPE                                                                                                                                           | CES. 138/024                                                                                              |
| 34 | The "Prof. Dr. Ion Chiricuta" Institute of Oncology - IOCN (Romania)              | IOCN Ethics Committee                                                                                                                                       | 296/23.05.2024                                                                                            |
| 35 | Institutul Oncologic "Al. Trestioreanu" - IOB (Romania)                           | Ethics Committee of the Bucharest Oncological Institute                                                                                                     | 37 / 13.12.2023                                                                                           |
| 36 | Oncology Institute of Vojvodina (Serbia)                                          | Etički odbor Instituta za onkologiju Vojvodine (Ethics Committee from Institute of Oncology Vojvodina)                                                      | 4/24/1-1923/2-3                                                                                           |
| 37 | Institute of Oncology Ljubljana (Slovenia)                                        | Komisija Republike Slovenije za medicinsko etiko                                                                                                            | 0120-219/2024-2711-4 (30/05/24)<br>Amendment 0120-219/2024-2711-9 (06.11.2024)                            |
| 38 | National Cancer Institute (Slovakia)                                              | Ethics Committee of National Cancer Institute, 883 10 Bratislava, Klenova 1, Slovakia.                                                                      | Nr. EUonQoL - Validation of the European Oncology Quality of Life Toolkit. A European Pilot Survey/2023/a |
| 39 | Vall Hebron Institute of Oncology - VHIO (Spain)                                  | Comité de ética de investigación con medicamentos y proyectos de investigación del Hospital Universitari Vall d'Hebron                                      | PR(AG)30/2024                                                                                             |
| 40 | Fundación Instituto Valenciano de Oncología - IVO (Spain)                         | Comité de ética de la investigación con medicamentos de la Fundación Instituto Valenciano de Oncología                                                      | 2023-18                                                                                                   |

|    |                                                           |                                                                                                                          |                      |
|----|-----------------------------------------------------------|--------------------------------------------------------------------------------------------------------------------------|----------------------|
| 41 | Sahlgrenska University Hospital of Goteborg (Sweden)      | Etikprövningsmyndigheten Uppsala                                                                                         | 2024-05472-01-665977 |
| 42 | Region Skåne - University Hospital Cancer Centre (Sweden) | Etikprövningsmyndigheten Uppsala                                                                                         | 2024-05472-01-665977 |
| 43 | Anadolu Medical Center (Turkey)                           | ASM hospital ethical committee                                                                                           | ASM-EK 24/ 265       |
| 44 | Türkiye Cancer Institute - TUSEB (Turkey)                 | Etik Kurulun S.B. Istanbul Medeniyet Üniversitesi Göztepe Eğitim Ve Araştırma Hastanesi Klinik Araştırmaları Etik Kurulu | 2023/0770            |
| 45 | Leeds Teaching Hospitals NHS Trust (United Kingdom)       | South West - Cornwall & Plymouth Research Ethics Committee                                                               | 24/SW/0098           |
